# Supplementary material for: Association between anthropometric measures and insulin resistance in Brazilian adolescents: data from the national study of cardiovascular risk factors in adolescents – ERICA
Source: publisher site journal article supplement (doi:10.1515/jpem-2021-0191), 2021-06-28
Supplement: Supplementary file 1 [file j_jpem-2021-0191_suppl.docx]

### [Center for Clinical and Epidemiological Research](http://depts.washington.edu/uwccer/) (EpiCenter)

[
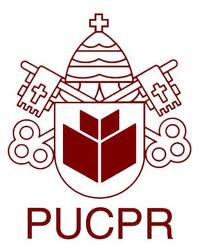
](http://www.google.com.br/imgres?um=1&sa=N&biw=1024&bih=568&hl=pt-PT&tbm=isch&tbnid=PnTIXpUa6GWKVM:&imgrefurl=http://007blog.net/inscricoes-para-o-vestibular-puc-pr-2013/&docid=blNHc7h5TJ_cxM&imgurl=http://007blog.net/fotos/2012/08/PUC-PR.jpg&w=356&h=450&ei=a-H-UY2FAYzQ8wTQlIHgDw&zoom=1&iact=hc&vpx=336&vpy=138&dur=1213&hovh=252&hovw=200&tx=87&ty=165&page=1&tbnh=152&tbnw=116&start=0&ndsp=16&ved=1t:429,r:2,s:0,i:87)

### School of Medicine - Pontifícia Universidade Católica do Paraná

**Association between anthropometric measures and insulin resistance in Brazilian adolescents: data from the national study of cardiovascular risk factors in adolescents – ERICA**

# **Submission to:** Journal of Pediatric Endocrinology and Metabolism

# Corresponding author:

Daiane Cristina Pazin

Rua José Martinho Lissa, n 48. Curitiba/PR, Brasil.

CEP 81210-245

Email address: daiane.pazin@yahoo.com.br / daiane.pazin@pucpr.br

March 16th, 2021

# Editor-in-Chief of Journal of Journal of Pediatric Endocrinology and Metabolism

We present our manuscript, which was reviewed and approved by all authors.

Our work is about the obesity pandemic, which is directly related to chronic diseases, as insulin resistance and type 2 diabetes mellitus, that are increasingly present in childhood and adolescence. It analyzes data from ERICA study, a cross-sectional and multicenter study whit Brazilian adolescents.

The identification of simple methods for the screening of cardiometabolic risk factors in this population may indicate an effective strategy. Our data showed that the main anthropometric measures has a positive association with the prevalence of IR, and their joint effect of BMI and central adiposity measures should be considered.

Our submission has no part yet disclosed and the authors have no competing interests to declare.

|  |
| --- |

We truly hope you will find our manuscript suitable


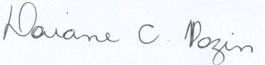


Yours sincerely,

Daiane C Pazin

Corresponding author
